# Supplementary material
Source: Research Square preprint supplement (doi:10.21203/rs.3.rs-8711293/v1)
Supplement: Supplementary file 1 [file ea6155da6e9a26b13deff66e.docx]

| **Annex** **1.** Conservation status of *Osmoxylon* species in the Philippines, including proposed provisional assessment. CE= Critically Endangered, EN=Endangered, VU= Vulnerable, NT=Near Threatened, LC=Least Concern, DD= Data Deficiency, NE, Not Evaluated, Threat classification is based on the IUCN CMP Unified Classification of Direct Threats. | | | | | | | |
| --- | --- | --- | --- | --- | --- | --- | --- |
| **Scientific Name** | **Local Name** | **Current IUCN Status 2024** | **Estimated # of localities** | **EOO (km2)** | **AOO (km2)** | **Proposed Provisional Status** | **Threats** | |
| 1. *O. camiguinense** |  | Not Evaluated | 4 | 66,048.036 | 16.00 | LC | 2. Agriculture & Aquaculture (2.1); 4. Transportation & Service Corridors (4.1); 5. Biological Resource Use (5.3) | |
| 2. *O. catanduanense** |  | Not Evaluated | 1 | 0 | 4.00 | CR (B2b[ii,iv]) | 2. Agriculture & Aquaculture (2.1); 5. Biological Resource Use (5.3) | |
| 3*. O. caudatum** |  | Not Evaluated | 3 | 6,461.89 | 12.00 | VU (B1b[i,iv]) | 2. Agriculture & Aquaculture (2.1); 5. Biological Resource Use (5.3) | |
| 4. *O. dinagatense** | Dinagat ayúm | Not Evaluated | 4 | 122.41 | 16.00 | EN (B1b[i,iv]) | 3. Energy Production & Mining (3.2); 4. Transportation & Service Corridors (4.1); 5. Biological Resource Use (5.3) | |
| 5. *O. eminens* | Apalong or Apulong; Buglui-babae; Mangunpulan; Palad-ulot; Piña-piña, Ulo-ulo; Lolobongan | Near Threatened | ca. 35 | 535,393.44 | 140.00 | LC | 1. Residential & Commercial Development (1.3); 2. Agriculture & Aquaculture (2.1); 3. Production & Mining (3.2); 5. Biological Resource Use (5.3) | |
| 6. *O. fenicis** | Fenix-ayum | Vulnerable | 10 | 50,274.75 | 40.00 | LC | 2. Agriculture & Aquaculture (2.1); 3. Production & Mining (3.2); 4. Transportation & Service Corridors (4.1); 5. Biological Resource Use (5.3) | |
| 7. *O. heterophyllum** | Arañas; Kayuang; Magusayag | Endangered | 8 | 26,287.48 | 32.00 | NT | 1. Residential & Commercial Development (1.3); 2. Agriculture & Aquaculture (2.1); 3. Production & Mining (3.2); 5. Biological Resource Use (5.3) | |
| 8. *O. humile** | Saranka-mano | Not Evaluated | 2 | 0 | 8.00 | CR (B2b[ii,iv]) | 1. Residential & Commercial Development (1.3); 2. Agriculture & Aquaculture (2.1); 3. Production & Mining (3.2); 5. Biological Resource Use (5.3) | |
| 9. *O. lineare* |  | Not Evaluated | 8 | 185,006.82 | 32.00 | LC | 1. Residential & Commercial Development (1.3); 3. Production & Mining (3.2); 5. Biological Resource Use (5.3) | |
| 10. *O. luzoniense* | Malakapayas; Gulo-ulo | Least Concern | ca. 28 | 411,559.38 | 112.00 | LC | 1. Residential & Commercial Development (1.3); 4. Transportation & Service Corridors (4.1); 5. Biological Resource Use (5.3) | |
| 11. *O. oblongifolium** |  | Not Evaluated | 10 | 13.973.44 | 36.00 | VU (B1b[i,iv]) | 1. Residential & Commercial Development (1.3); 2. Agriculture & Aquaculture (2.1); 5. Biological Resource Use (5.3) | |
| 12. *O. pectinatum* | Narapan | Least Concern | 3 | 6,784.46 | 12.00 | VU (B1b[i,iv]) | 1. Residential & Commercial Development (1.3); 2. Agriculture & Aquaculture (2.1); 3. Production & Mining (3.2); 5. Biological Resource Use (5.3) | |
| 13. *O. pulcherrimum* | Paladukai; Salapak; Palad-amok | Near Threatened | ca. 20 | 284,472.72 | 80.00 | LC | 1. Residential & Commercial Development (1.3); 2. Agriculture & Aquaculture (2.1); 3. Production & Mining (3.2); 5. Biological Resource Use (5.3) | |
| 14. *O. ramosii** |  | Endangered | 6 | 81,757.94 | 24.00 | LC | 1. Residential & Commercial Development (1.3); 2. Agriculture & Aquaculture (2.1); 3. Production & Mining (3.2); 5. Biological Resource Use (5.3) | |
| 15. *O. serratifolium** |  | Endangered | 6 | 78,121.48 | 24.00 | LC | 1. Residential & Commercial Development (1.3); 2. Agriculture & Aquaculture (2.1); 3. Production & Mining (3.2); 4. Transportation & Service Corridors (4.1); 5. Biological Resource Use (5.3) | |
| 16. *O. simplicifolium** | Bolawano | Endangered | 8 | 110.518.07 | 32.00 | LC | 1. Residential & Commercial Development (1.3); 2. Agriculture & Aquaculture (2.1); 3. Energy Production & Mining (3.2); 5. Biological Resource Use (5.3) | |
| 17. *O. trilobatum** | Kamay-kamay | Near Threatened | ca. 24 | 125,765.83 | 28.00 | LC | 1. Residential & Commercial Development (1.3); 2. Agriculture & Aquaculture (2.1); 5. Biological Resource Use (5.3) | |
| 18. *O. yatesii** | Magalayag; Yates ayúm | Not Evaluated | 13 | 124,958.28 | 52.00 | LC | 1. Residential & Commercial Development (1.3); 2. Agriculture & Aquaculture (2.1); 3. Energy Production & Mining (3.2); 5. Biological Resource Use (5.3) | |

***Note****: For Endemism (*********) Philippines Endemic (PE), and (****)*** *Non-endemic (NE).*
